# Supplementary material for: Substantial Impairment of Quality of Life during COVID-19 Pandemic in Patients with Advanced Rectal Cancer
Source: MDPI journal article supplement (doi:10.3390/healthcare10081513), 2022-08-11
Supplement: s1 [file s1]

## Supplementary Materials:

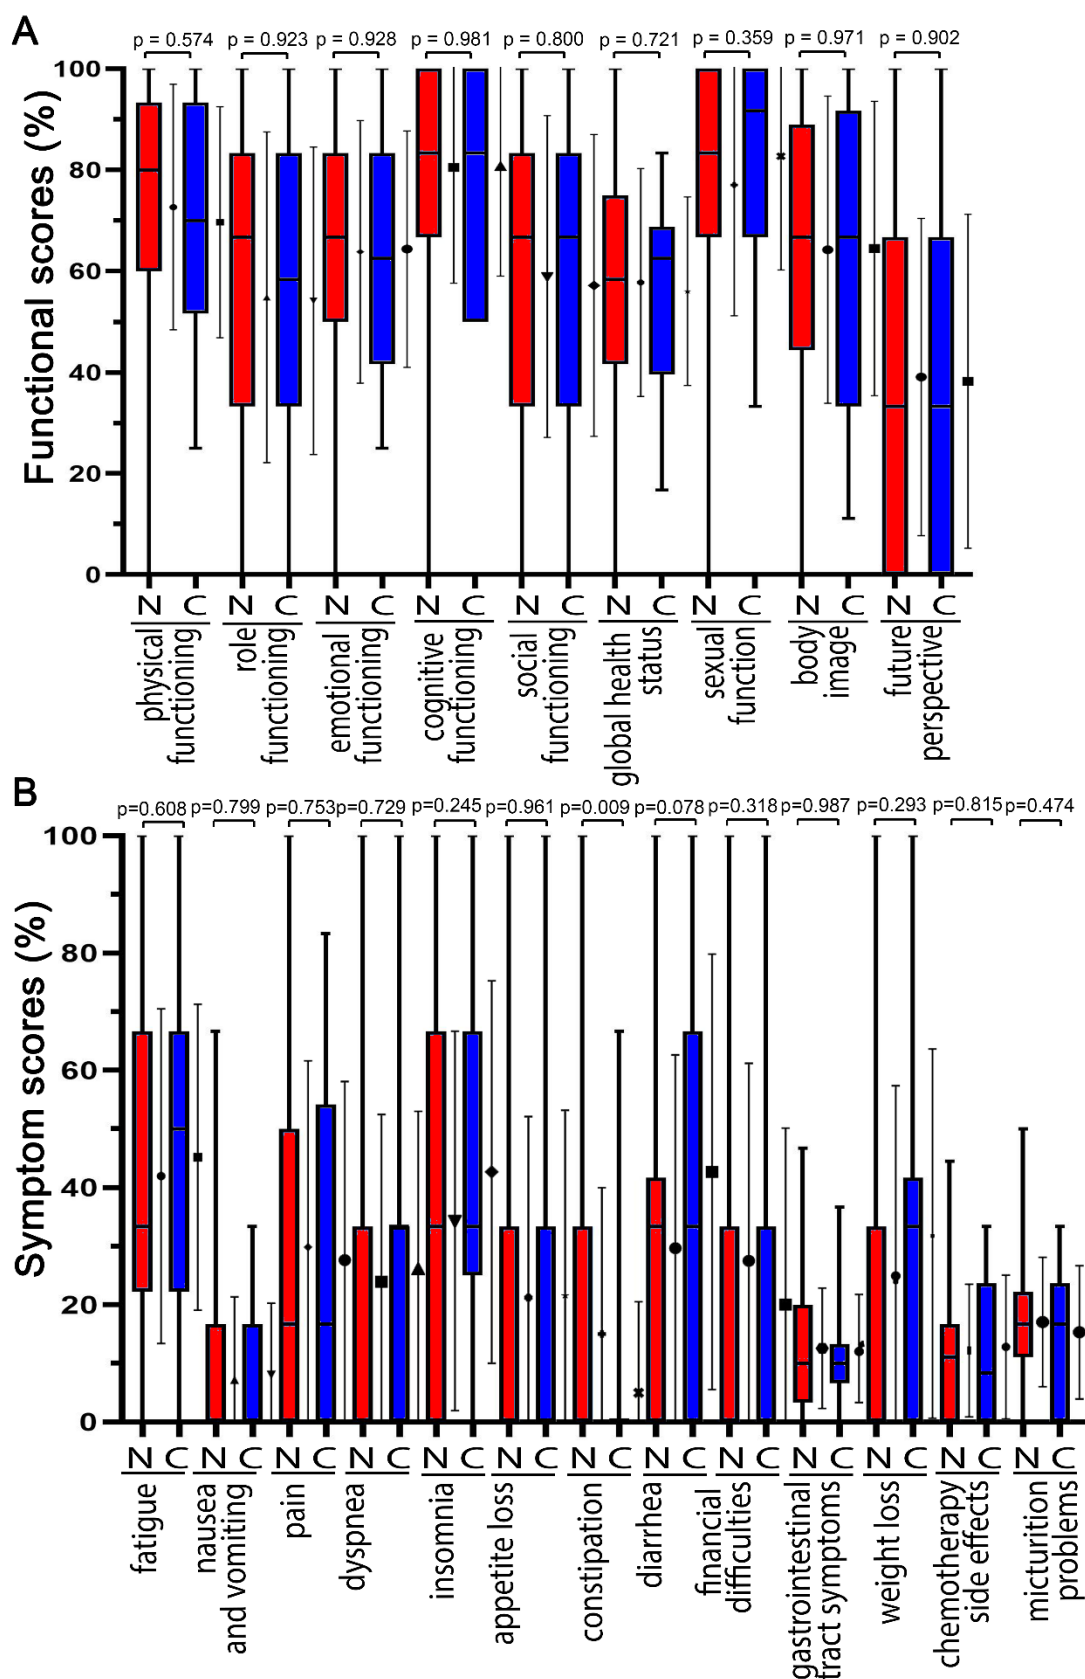

**Figure S1.** The functional and symptom score distribution of prior to COVID-19 pandemic (N = non COVID) compared with during COVID-19 pandemic (C = during COVID pandemic). Scores were surveyed on day 70 (5 weeks) after radiochemotherapy. **(A)** Functionalscores are: physicalfunctioning, rolefunctioning, emotionalfunctioning, cognitive functioning, socialfunctioning, globalhealth status, sexualfunction, body image, and future perspective. **(B)** Symptom scores are: fatigue, nausea and vomiting, pain, dyspnea, insomnia, appetite loss, constipation, diarrhea, financial difficulties, gastrointestinal tract symptoms, weight loss, chemotherapy side effects, and micturition problems.

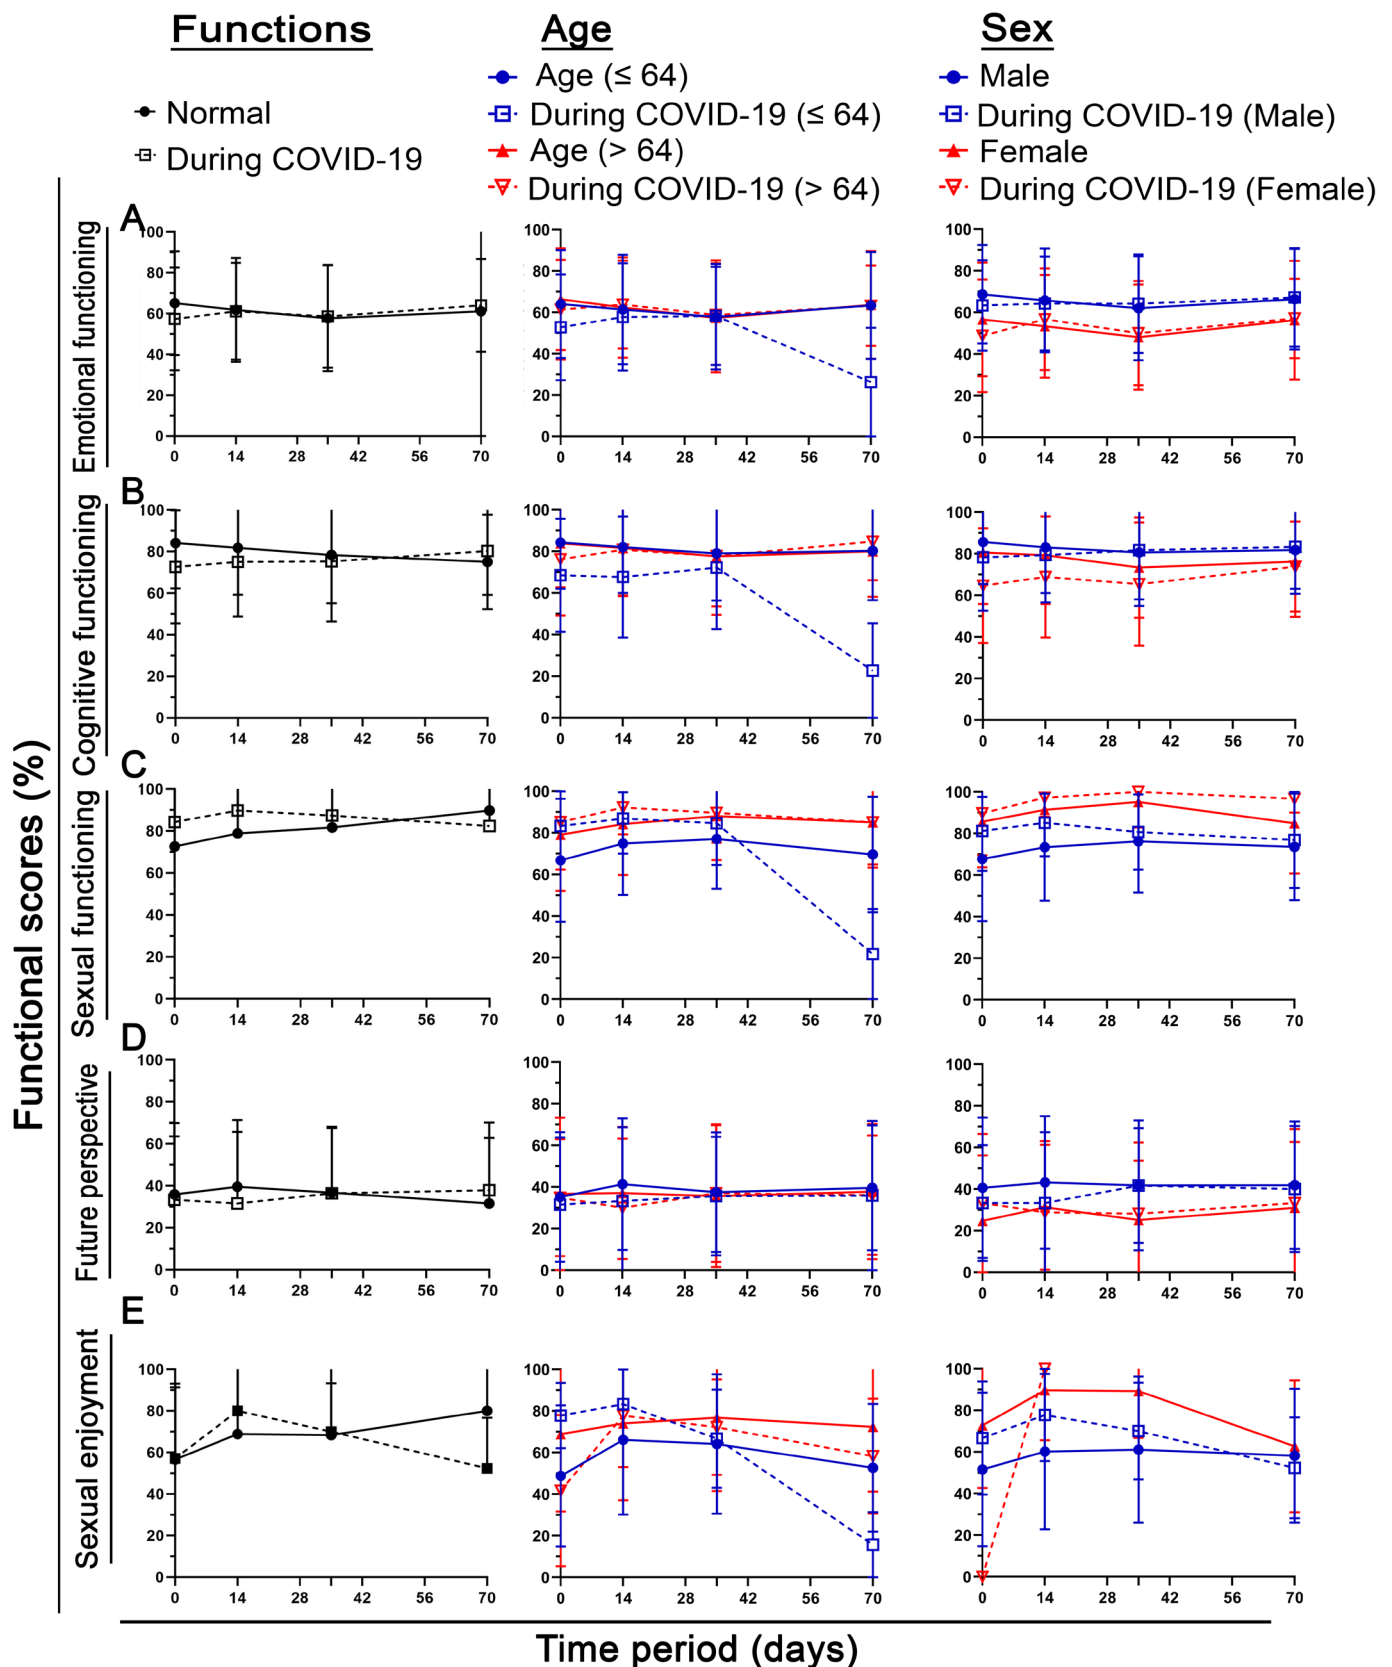

**Figure S2.** Time course of different functional scores at day -1, day 14, day 35 and day 70. In the first column the entire cohort is separated into normal (before COVID-19) and during COVID-19. In the second column the cohort was divided in patients younger or 64 to older than 64. In the third column females and males of the cohort were compared for **(A)** emotional functioning, **(B)** cognitive functioning, **(C)** sexual functioning, **(D)** future perspective, and **(E)** sexual enjoyment.

# Symptom scores (%)

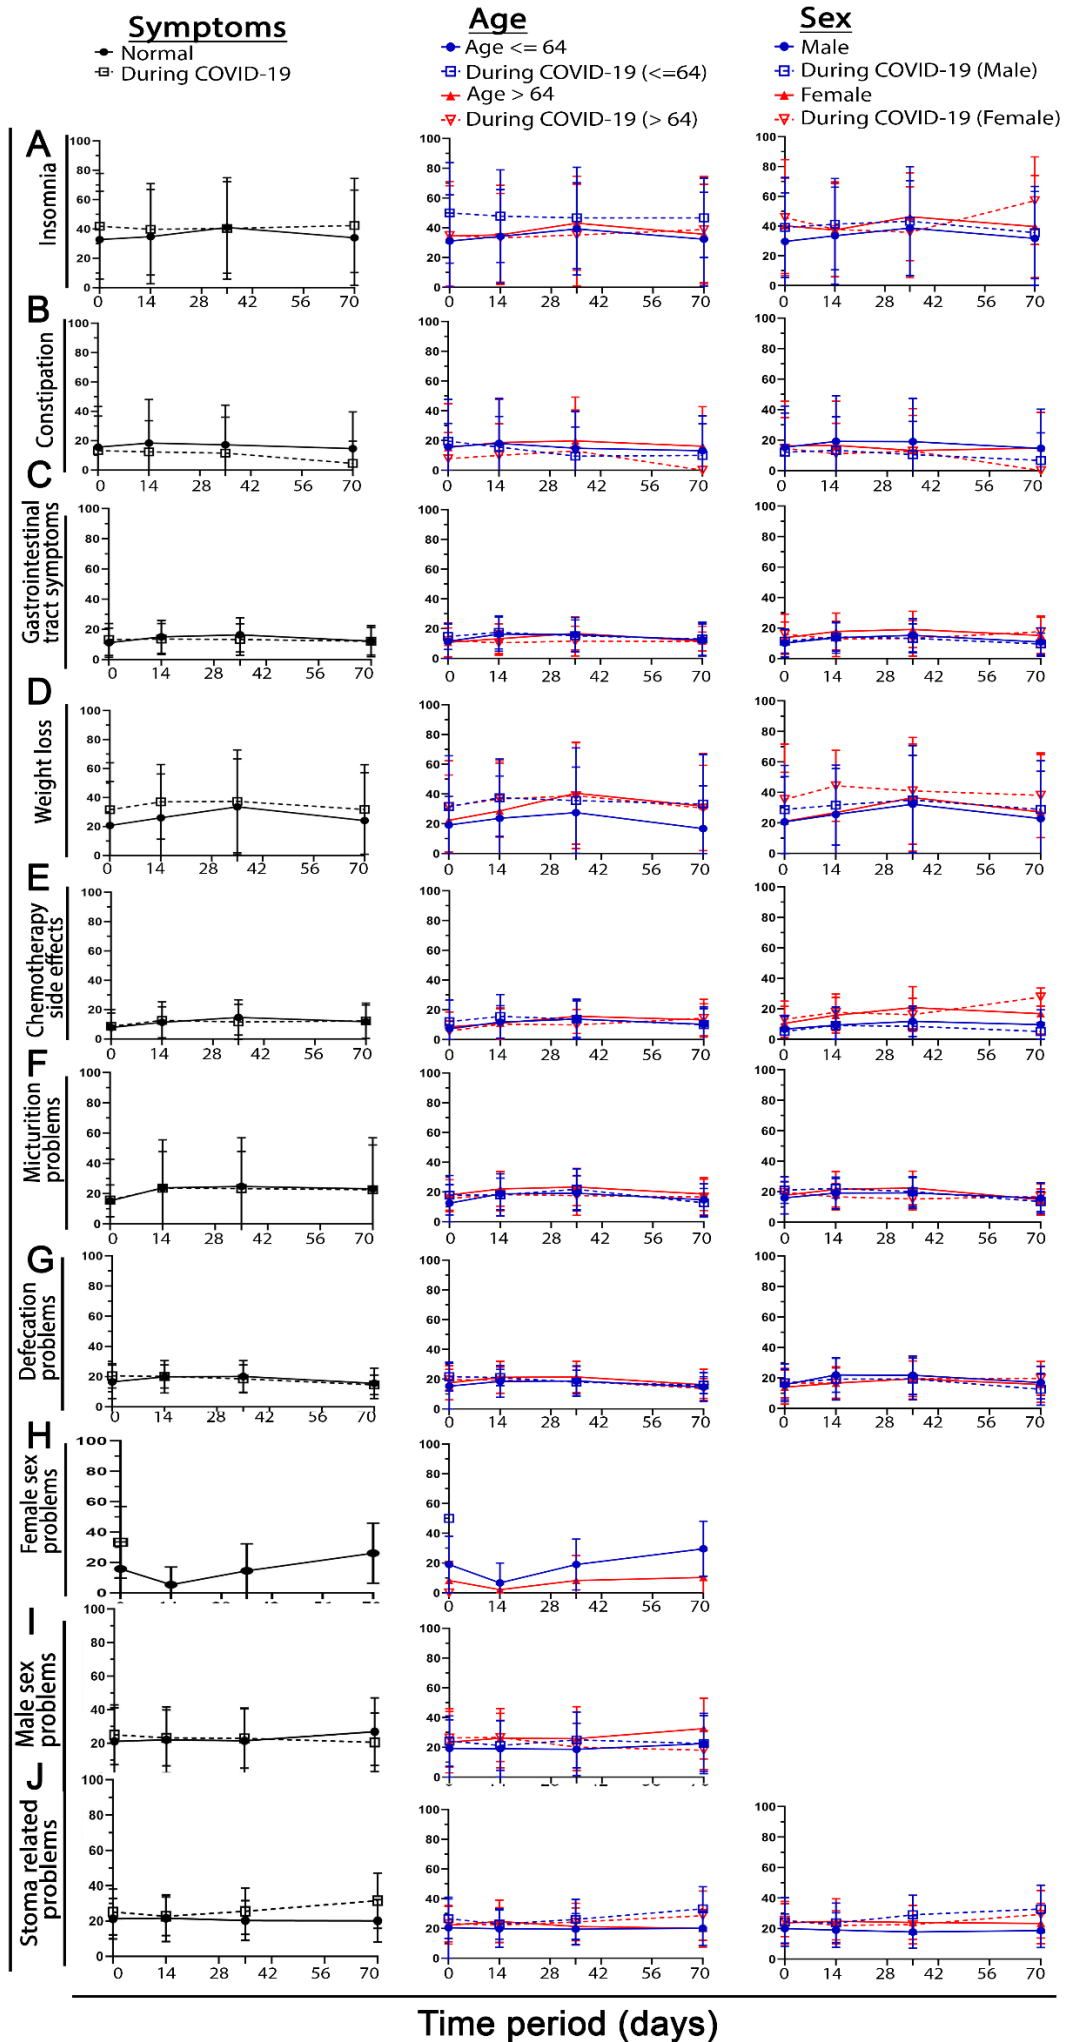

**Figure S3.** Time course of different symptom scores at day -1, day 14, day 35 and day 70. In the first column the entire cohort is separated into normal (before COVID-19) and during COVID-19. In the second column the cohort was divided in patients younger or 64 to older than 64. In the third column females and males of the cohort were compared for **(A)** insomnia, **(B)** constipation, **(C)** gastrointestinal tract symptoms, **(D)** weight loss, **(E)** chemotherapy side effects, **(F)** micturition, **(G)** defecation problems, **(H)** female sex problems, **(I)** male sex problems, and **(J)** stoma related problems at the different time periods at which the surveys took place, at day -1, day 14, day 35 and day 70.
